# Supplementary material for: Comparative transcriptome analyses reveal genes associated with SARS-CoV-2 infection of human lung epithelial cells
Source: PubMed Central journal article supplement (PMC8355180; doi:10.1038/s41598-021-95733-w), 2021-08-10

**Comparative transcriptome analyses reveal genes associated with SARS-CoV-2 infection of human lung epithelial cells**

Darshan S. Chandrashekar<sup>1,\*</sup>, Mohammad Athar<sup>2,3</sup>, Upender Manne<sup>1,3#</sup>, Sooryanarayana Varambally<sup>1,3,4##\*</sup>

<sup>1</sup>Department of Pathology, University of Alabama at Birmingham, Birmingham, AL

<sup>2</sup>Department of Dermatology, University of Alabama at Birmingham, Birmingham, AL

<sup>3</sup>O'Neal Comprehensive Cancer Center, University of Alabama at Birmingham, Birmingham, AL

<sup>4</sup>Informatics Institute, University of Alabama at Birmingham, Birmingham, AL

# Share Senior Authorship

\*Correspondence to: Sooryanarayana Varambally, Ph.D., Molecular and Cellular Pathology, Department of Pathology, Wallace Tumor Institute, 4<sup>th</sup> floor, 20B, University of Alabama at Birmingham, Birmingham, AL 35233, USA Phone: (205) 996-1654

Email: [soorya@uab.edu](mailto:soorya@uab.edu)

And

Darshan S. Chandrashekar Ph.D., Department of Pathology, University of Alabama at Birmingham, Birmingham, AL

Email: [dshimogachandrasheka@uabmc.edu](mailto:dshimogachandrasheka@uabmc.edu)

**Supplementary figure S1: Summarization of comparative transcriptome analysis and validation.** (a) Volcano plot showing result of differential expression analysis using RNA-seq data associated with SARS-CoV-2-infected human bronchial organoids. (b) Heatmap showing expression pattern of SARS-CoV-2 exclusive genes in SARS-CoV-2-infected human bronchial organoids. (c) Genes commonly altered in human lung epithelial cells on infection of SARS-CoV-2, SARS and other human/avian influenza viruses.

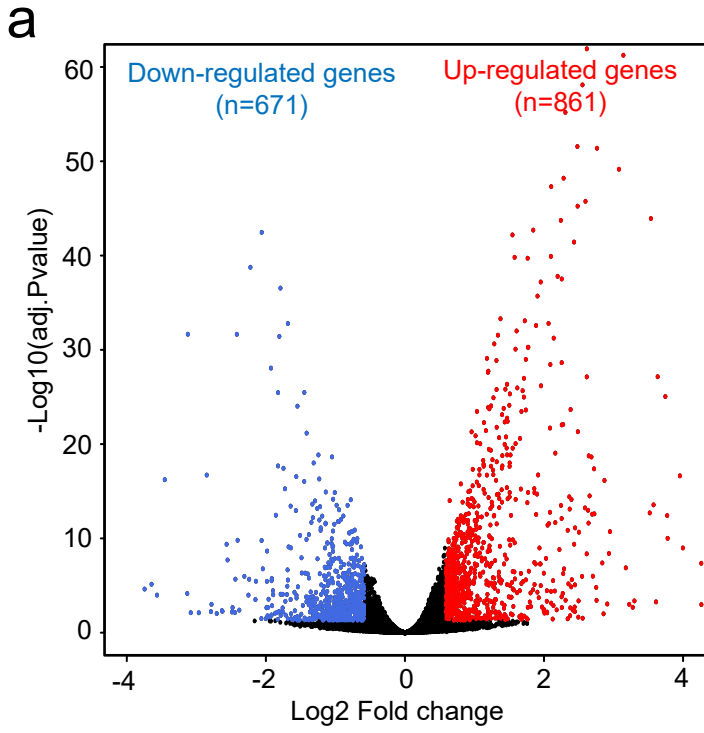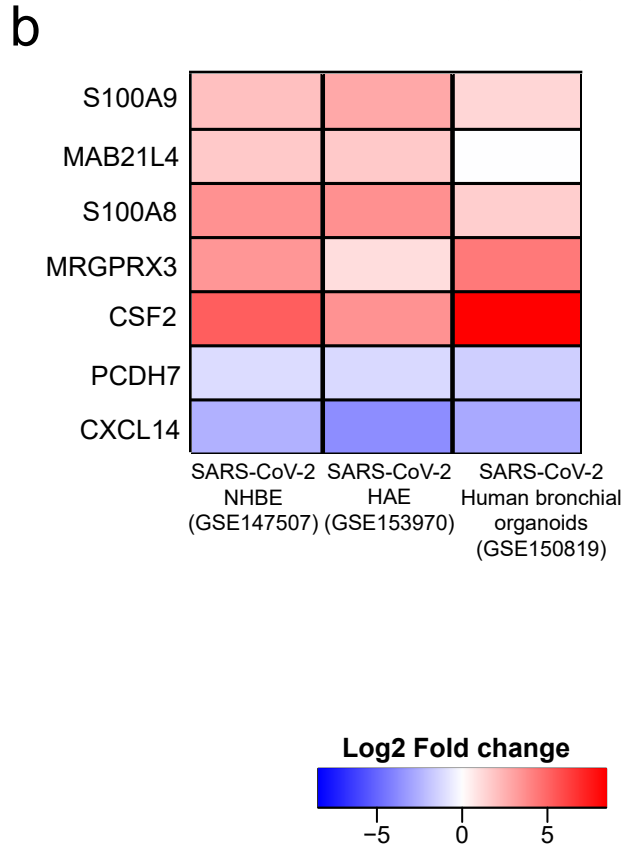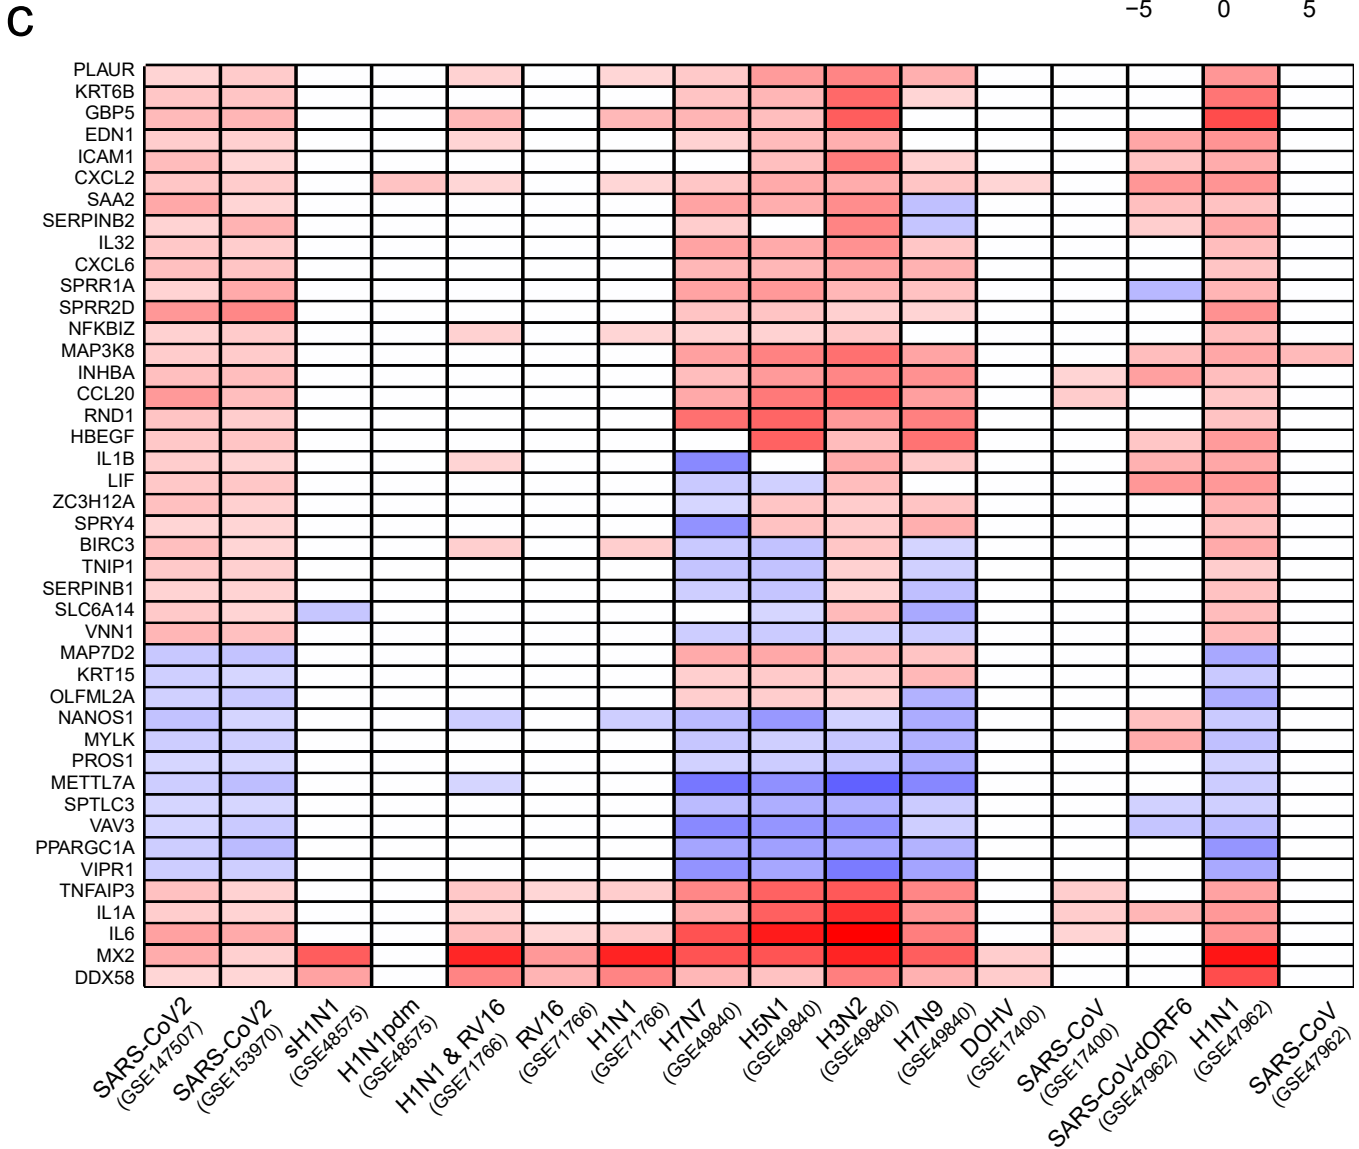

Supplement: 41598_2021_95733_MOESM1_ESM.pdf [file 41598_2021_95733_MOESM1_ESM.pdf]
